# Supplementary material for: Effects of Chinese traditional ethnic sports on sleep quality among the elderly: a systematic review and meta-analysis
Source: PeerJ. 2025 Feb 21;13:e19019. doi: 10.7717/peerj.19019 (PMC11849518; doi:10.7717/peerj.19019)
Supplement: Supplemental Information 1 [file peerj-13-19019-s001.xlsx]

## Sheet: Sheet1
Total PSQI score								Subgroup
Included in Study	Experimental Group Sample Size	Experimental Group Mean	Experimental Group Standard Deviation	Control Group Sample Size	Control Group Mean	Control Group Standard Deviation		Included in Study	Country	sample size	Age	Intervention Method	Intervention Method Group	Intervention Time	Intervention Time Group	Intervention Period	Intervention Period Group	Type of Elderly	Type of Elderly Group	Control Group Intervention Content
Wang, C.2024	30	-1.122	4.23565	25	0.154	3.4602		Wang, C.2024	China	55	68.9±5.1	Taiji	Taiji	60minutes	46-120minutes	8weeks	8-12weeks	Normal Community Elderly	Normal Elderly	Normal Life
Siu, P. M.2021	91	-3.4	3.43948	90	-0.5	3.36006		Siu, P. M.2021	China	181	67.3±6.8	Taiji	Taiji	60minutes	46-120minutes	12weeks	8-12weeks	Elderly with Insomnia	失眠老年人	Normal Life
Nguyen, M. H.2012	48	-5.79	4.42146	48	-0.13	3.94415		Nguyen, M. H.2012	Germany	96	68.9±5.1	Taiji	Taiji	60minutes	46-120minutes	24weeks	13-36weeks	Normal Community Elderly	Normal Elderly	Normal Life
Irwin, M. R.2008（A）	29	0.42	2.16405	30	0.04	1.62231		Irwin, M. R.2008	U.S	112	59-86	Taiji	Taiji	40minutes	0-45minutes	25weeks	13-36weeks	Healthy Elderly	Normal Elderly	Health Education
Irwin, M. R.2008（B）	31	-1.54	2.59838	22	-1.87	3.48495							Taiji		0-45minutes		13-36weeks		Elderly with Insomnia
Hosseini2011	27	-1.73	2.49734	29	-0.344	2.36768		Hosseini2011	Iran	56	60-83	Taiji	Taiji	20-25minutes	0-45minutes	12weeks	8-12weeks	Normal Community Elderly	Normal Elderly	Normal Life
Wang2019	45	-2.44	2.08885	44	-0.09	2.49357		Wang2019	China	99	71.15±8.59	Qigong	Qigong	45minutes	0-45minutes	12weeks	8-12weeks	Normal Community Elderly	Normal Elderly	Sleep Knowledge Promotion
Michael R. Irwin2014	48	-2.7	3.26037	25	-1.5	2.95127		Michael R. Irwin2014	U.S	98	55-85	Taiji	Taiji	120minutes	46-120minutes	12weeks	8-12weeks	Elderly with Chronic or Primary Insomnia	Elderly with Insomnia	Sleep Knowledge Promotion
Fuzhong Li2004	62	-2.06	2.04118	56	-0.87	2.6257		Fuzhong Li2004	U.S	118	60-92	Taiji	Taiji	60minutes	46-120minutes	24weeks	13-36weeks	Healthy Elderly	Normal Elderly	Low-Intensity Aerobic Exercise
Beifang Fan2020	67	-2.6	3.67559	72	-0.5	4.25793		Beifang Fan2020	China	119	71.15±6.3	Qigong	Qigong	45minutes	0-45minutes	24weeks	13-36weeks	Community Elderly with Insomnia Disorder	Elderly with Insomnia	Normal Life
Chen2011	27	-5.11	3.03111	28	-0.61	3.43684		Chen2011	China	55	71.15±8.13	Qigong	Qigong	30minutes	0-45minutes	12weeks	8-12weeks	Normal Community Elderly	Normal Elderly	Normal Life
Sleep quality								Subgroup
Included in Study	Experimental Group Sample Size	Experimental Group Mean	Experimental Group Standard Deviation	Control Group Sample Size	Control Group Mean	Control Group Standard Deviation		Included in Study	Country	sample size	Age	Intervention Method	Intervention Method Group	Intervention Time	Intervention Time Group	Intervention Period	Intervention Period Group	Type of Elderly	Type of Elderly Group	Control Group Intervention Content
Irwin, M. R.2008（A）	29	0.12	0.572975	30	0.09	0.565066		Irwin, M. R.2008	U.S	112	59-86	Taiji	Taiji	40minutes	31-60minutes	25weeks	13-36weeks	Healthy Elderly	Normal Elderly	Health Education
Irwin, M. R.2008（B）	31	-0.41	0.592284	22	-0.09	0.740203							Taiji		31-60minutes		13-36weeks		Elderly with Insomnia
Wang2019	45	-0.59	0.460326	44	-0.03	0.461628		Wang2019	China	99	60+	Qigong	Qigong	45minutes	31-60minutes	12weeks	8-12weeks	Normal Community Elderly	Normal Elderly	Sleep Knowledge Promotion
Fuzhong Li2004	62	-0.92	0.747061	56	-0.18	0.86238		Fuzhong Li2004	U.S	118	60-92	Taiji	Taiji	60minutes	31-60minutes	24weeks	13-36weeks	Healthy Elderly	Normal Elderly	Low-Intensity Aerobic Exercise
Chen2011	27	-1.11	0.537024	28	0	0.0766225		Chen2011	China	55	71.15±8.13	Qigong	Qigong	30minutes	0-30minutes	12weeks	8-12weeks	Normal Community Elderly	Normal Elderly	Normal Life
Sleep onset								Subgroup
Included in Study	Experimental Group Sample Size	Experimental Group Mean	Experimental Group Standard Deviation	Control Group Sample Size	Control Group Mean	Control Group Standard Deviation		Included in Study	Country	sample size	Age	Intervention Method	Intervention Method Group	Intervention Time	Intervention Time Group	Intervention Period	Intervention Period Group	Type of Elderly	Type of Elderly Group	Control Group Intervention Content
Siu, P. M.2021	91	0.5	5.40278	90	0.6	7.59012		Siu, P. M.2021	China	181	60+	Taiji	Taiji	60minutes	31-60minutes	12weeks	8-12weeks	Elderly with Insomnia	Elderly with Insomnia	Normal Life
Irwin, M. R.2008（A）	29	-0.02	0.602246	30	-0.15	0.393954		Irwin, M. R.2008	U.S	112	59-86	Taiji	Taiji	40minutes	31-60minutes	25weeks	13-36weeks	Healthy Elderly	Normal Elderly	Health Education
Irwin, M. R.2008（B）	31	-0.04	0.858604	22	-0.19	0.963893							Taiji		31-60minutes		13-36weeks		Elderly with Insomnia
Wang2019	45	-0.75	0.56205	44	-0.02	0.492747		Wang2019	China	99	60+	Qigong	Qigong	45minutes	31-60minutes	12weeks	8-12weeks	Normal Community Elderly	Normal Elderly	Sleep Knowledge Promotion
Michael R. Irwin2014	48	-11.5	4.65188	25	-12.2	4.75079		Michael R. Irwin2014	U.S	98	55-85	Taiji	Taiji	120minutes	61-120minutes	12weeks	8-12weeks	Elderly with Chronic or Primary Insomnia	Elderly with Insomnia	Sleep Knowledge Promotion
Fuzhong Li2004	62	-23.44	27.9871	56	-5.55	27.2315		Fuzhong Li2004	U.S	118	60-92	Taiji	Taiji	60minutes	31-60minutes	24weeks	13-36weeks	Healthy Elderly	Normal Elderly	Low-Intensity Aerobic Exercise
Chen2011	27	-0.96	0.484458	28	-0.08	0.74505		Chen2011	China	55	71.15±8.13	Qigong	Qigong	30minutes	0-30minutes	12weeks	8-12weeks	Normal Community Elderly	Normal Elderly	Normal Life
Sleep duration								Subgroup
Included in Study	Experimental Group Sample Size	Experimental Group Mean	Experimental Group Standard Deviation	Control Group Sample Size	Control Group Mean	Control Group Standard Deviation		Included in Study	Country	sample size	Age	Intervention Method	Intervention Method Group	Intervention Time	Intervention Time Group	Intervention Period	Intervention Period Group	Type of Elderly	Type of Elderly Group	Control Group Intervention Content
Siu, P. M.2021	91	-8.1	69.7009	90	-8	78.1069		Siu, P. M.2021	China	181	60+	Taiji	Taiji	60minutes	46-120minutes	12weeks	8-12weeks	Elderly with Insomnia	Elderly with Insomnia	Normal Life
Irwin, M. R.2008（A）	29	-0.13	0.482804	30	-0.02	0.648999		Irwin, M. R.2008	U.S	112	59-86	Taiji	Taiji	40minutes	0-45minutes	25weeks	13-36weeks	Healthy Elderly	Normal Elderly	Health Education
Irwin, M. R.2008（B）	31	-0.13	0.711407	22	-0.13	0.825409							Taiji		0-45minutes		13-36weeks		Elderly with Insomnia
Wang2019	45	-0.42	0.47697	44	-0.05	0.455302		Wang2019	China	99	60+	Qigong	Qigong	45minutes	0-45minutes	12weeks	8-12weeks	Normal Community Elderly	Normal Elderly	Sleep Knowledge Promotion
Michael R. Irwin2014	48	-42.3	9.24067	25	-29.7	21.6002		Michael R. Irwin2014	U.S	98	55-85	Taiji	Taiji	120minutes	46-120minutes	12weeks	8-12weeks	Elderly with Chronic or Primary Insomnia	Elderly with Insomnia	Sleep Knowledge Promotion
Fuzhong Li2004	62	-0.87	1.13133	56	-0.06	1.31023		Fuzhong Li2004	U.S	118	60-92	Taiji	Taiji	60minutes	46-120minutes	24weeks	13-36weeks	Healthy Elderly	Normal Elderly	Low-Intensity Aerobic Exercise
Chen2011	27	-0.89	0.537029	28	-0.07	0.705479		Chen2011	China	55	71.15±8.13	Qigong	Qigong	30minutes	0-45minutes	12weeks	8-12weeks	Normal Community Elderly	Normal Elderly	Normal Life
Sleep efficiency									Subgroup
Included in Study	Experimental Group Sample Size	Experimental Group Mean	Experimental Group Standard Deviation	Control Group Sample Size	Control Group Mean	Control Group Standard Deviation		Included in Study	Country	sample size	Age	Intervention Method	Intervention Method Group	Intervention Time	Intervention Time Group	Intervention Period	Intervention Period Group	Type of Elderly	Type of Elderly Group	Control Group Intervention Content
Siu, P. M.2021	91	-1.8	7.33689	90	-1.3	9.91363		Siu, P. M.2021	China	181	60+	Taiji	Taiji	60minutes	46-120minutes	12weeks	8-12weeks	Elderly with Insomnia	Elderly with Insomnia	Normal Life
Irwin, M. R.2008（A）	29	-0.14	0.424617	30	-0.07	0.587963		Irwin, M. R.2008	U.S	112	59-86	Taiji	Taiji	40minutes	0-45minutes	25weeks	13-36weeks	Healthy Elderly	Normal Elderly	Health Education
Irwin, M. R.2008（B）	31	-0.25	0.756241	22	-0.17	0.950158							Taiji		0-45minutes		13-36weeks		Elderly with Insomnia
Wang2019	45	-0.75	0.485077	44	-0.17	0.658255		Wang2019	China	99	60+	Qigong	Qigong	45minutes	0-45minutes	12weeks	8-12weeks	Normal Community Elderly	Normal Elderly	Sleep Knowledge Promotion
Michael R. Irwin2014	48	-7.6	2.16564	25	-4.9	3.31512		Michael R. Irwin2014	U.S	98	55-85	Taiji	Taiji	120minutes	46-120minutes	12weeks	8-12weeks	Elderly with Chronic or Primary Insomnia	Elderly with Insomnia	Sleep Knowledge Promotion
Fuzhong Li2004	62	-0.71	1.08291	56	-0.05	1.25431		Fuzhong Li2004	U.S	118	60-92	Taiji	Taiji	60minutes	46-120minutes	24weeks	13-36weeks	Healthy Elderly	Normal Elderly	Low-Intensity Aerobic Exercise
Chen2011	27	-0.85	0.817068	28	-0.32	0.719236		Chen2011	China	55	71.15±8.13	Qigong	Qigong	30minutes	0-45minutes	12weeks	8-12weeks	Normal Community Elderly	Normal Elderly	Normal Life
Sleep disturbances								Subgroup
Included in Study	Experimental Group Sample Size	Experimental Group Mean	Experimental Group Standard Deviation	Control Group Sample Size	Control Group Mean	Control Group Standard Deviation		Included in Study	Country	sample size	Age	Intervention Method	Intervention Method Group	Intervention Time	Intervention Time Group	Intervention Period	Intervention Period Group	Type of Elderly	Type of Elderly Group	Control Group Intervention Content
Irwin, M. R.2008（A）	29	-0.09	0.481352	30	0.02	0.536749		Irwin, M. R.2008	U.S	112	59-86	Taiji	Taiji	40minutes	31-60minutes	25weeks	13-36weeks	Healthy Elderly	Normal Elderly	Health Education
Irwin, M. R.2008（B）	31	-0.25	0.61	22	-0.45	0.441162							Taiji		31-60minutes		13-36weeks		Elderly with Insomnia
Wang2019	45	-0.1	0.421545	44	-0.08	0.365923		Wang2019	China	99	60+	Qigong	Qigong	45minutes	31-60minutes	12weeks	8-12weeks	Normal Community Elderly	Normal Elderly	Sleep Knowledge Promotion
Fuzhong Li2004	62	-0.39	0.586174	56	-0.07	0.550545		Fuzhong Li2004	U.S	118	60-92	Taiji	Taiji	60minutes	31-60minutes	24weeks	13-36weeks	Healthy Elderly	Normal Elderly	Low-Intensity Aerobic Exercise
Chen2011	27	-0.19	0.48	28	0.04	0.375899		Chen2011	China	55	71.15±8.13	Qigong	Qigong	30minutes	0-30minutes	12weeks	8-12weeks	Normal Community Elderly	Normal Elderly	Normal Life
Sleep Meds								Subgroup
Included in Study	Experimental Group Sample Size	Experimental Group Mean	Experimental Group Standard Deviation	Control Group Sample Size	Control Group Mean	Control Group Standard Deviation		Included in Study	Country	sample size	Age	Intervention Method	Intervention Method Group	Intervention Time	Intervention Time Group	Intervention Period	Intervention Period Group	Type of Elderly	Type of Elderly Group	Control Group Intervention Content
Irwin, M. R.2008（A）	29	0.14	0.389358	30	0.11	0.32		Irwin, M. R.2008	U.S	112	59-86	Taiji	Taiji	40minutes	31-60minutes	25weeks	13-36weeks	Healthy Elderly	Normal Elderly	Health Education
Irwin, M. R.2008（B）	31	-0.25	0.744849	22	0.09	0.768							Taiji		31-60minutes		13-36weeks		Elderly with Insomnia
Wang2019	45	-0.09	0.216564	44	-0.06	0.192873		Wang2019	China	99	60+	Qigong	Qigong	45minutes	31-60minutes	12weeks	8-12weeks	Normal Community Elderly	Normal Elderly	Sleep Knowledge Promotion
Fuzhong Li2004	62	-0.15	0.81265	56	0.02	0.884251		Fuzhong Li2004	U.S	118	60-92	Taiji	Taiji	60minutes	31-60minutes	24weeks	13-36weeks	Healthy Elderly	Normal Elderly	Low-Intensity Aerobic Exercise
Chen2011	27	-0.52	1.17043	28	-0.03	1.00538		Chen2011	China	55	71.15±8.13	Qigong	Qigong	30minutes	0-30minutes	12weeks	8-12weeks	Normal Community Elderly	Normal Elderly	Normal Life
Daytime dysfunction								Subgroup
Included in Study	Experimental Group Sample Size	Experimental Group Mean	Experimental Group Standard Deviation	Control Group Sample Size	Control Group Mean	Control Group Standard Deviation		Included in Study	Country	sample size	Age	Intervention Method	Intervention Method Group	Intervention Time	Intervention Time Group	Intervention Period	Intervention Period Group	Type of Elderly	Type of Elderly Group	Control Group Intervention Content
Irwin, M. R.2008（A）	29	-0.06	0.71631	30	-0.09	0.490306		Irwin, M. R.2008	U.S	112	59-86	Taiji	Taiji	40minutes	31-60minutes	25weeks	13-36weeks	Healthy Elderly	Normal Elderly	Health Education
Irwin, M. R.2008（B）	31	-0.26	0.59	22	-0.55	0.381235							Taiji		31-60minutes		13-36weeks		Elderly with Insomnia
Wang2019	45	-0.38	0.396106	44	-0.11	0.4		Wang2019	China	99	60+	Qigong	Qigong	45minutes	31-60minutes	12weeks	8-12weeks	Normal Community Elderly	Normal Elderly	Sleep Knowledge Promotion
Fuzhong Li2004	62	-0.2	0.597746	56	-0.11	0.646297		Fuzhong Li2004	U.S	118	60-92	Taiji	Taiji	60minutes	31-60minutes	24weeks	13-36weeks	Healthy Elderly	Normal Elderly	Low-Intensity Aerobic Exercise
Chen2011	27	-1.18	0.556687	28	-0.14	0.720833		Chen2011	China	55	71.15±8.13	Qigong	Qigong	30minutes	0-30minutes	12weeks	8-12weeks	Normal Community Elderly	Normal Elderly	Normal Life
